# Supplementary material for: Development of self-compatible Chinese cabbage lines of Chiifu through marker-assisted selection
Source: Front Plant Sci. 2024 May 30;15:1397018. doi: 10.3389/fpls.2024.1397018 (PMC11169807; doi:10.3389/fpls.2024.1397018)
Supplement: Supplementary file 2 [file Table_1.xlsx]

## Sheet: Table S1
Table S1. Parameter settings of KASP reaction volume.
Component	1 reaction (μl)
DNA (10ng/ul)	1.8
KASP Master mix (2x)	2
Primer assay mix (10μmol)	0.2
Total volume	4

## Sheet: Table S2
Table S2. Thermal cycling conditions for KASP chemistry of SC-MLPK.
Conditions	Stage
95℃ for 10 minutes	Hot-start activation
95℃ for 20 seconds 64℃ for 45 seconds (dropping 0.6℃ per cycle)	10cycles
95℃ for 20 seconds 55℃ for 45 seconds	26/32cycles

## Sheet: Table S3
Table S3. Information of SNPs on MLPK gene of 524 B. rapa genomes.
Annotation	Chiifu v3.0 chromosome	Chiifu v3.0 position	Ref	Alt	R069	R228	R196	R181	R060	R404	R015	R083	R224	R233	R010	R077	R035	R064	R011	R055	R195	R179	R139	R008	R075	R028	R186	R403	R164	R184	R152	R091	R145	R299	R157	R200	R038	R090	R043	R074	R234	R171	R163	R151	R178	R137	R168	R170	R409
_	A03	12152798	G	T	GG	GG	GG	GG	GG	GG	GG	GG	GG	GG	GG	GG	GG	GG	GG	GG	GG	GG	GG	GG	GG	GG	GG	GG	GG	GG	GG	GG	GG	GG	GG	GG	GG	GG	GG	GG	GG	GG	GG	GG	GG	GG	GG	GG	GG
_	A03	12152848	T	C	TT	TT	TT	TT	TT	TT	TT	TT	TT	TT	TT	TT	TT	TT	TT	TT	TT	TT	TT	TT	TT	TT	TT	TT	TT	TT	TT	TT	TT	TT	TT	TT	TT	TT	TT	TT	TT	TT	TT	TT	TT	TT	TT	TT	TT
_	A03	12152990	G	A	GG	GG	GG	GG	GG	GG	GG	GG	GG	GG	GG	GG	GG	GG	GG	GG	GG	GG	GG	GG	GG	GG	GG	GG	GG	GG	GG	GG	GG	GG	GG	GG	GG	GG	GG	GG	GG	GG	GG	GG	GG	GG	GG	GG	GG
_	A03	12153098	A	T	AA	AA	TT	TT	AA	AT	AA	AA	AA	AA	AA	AA	AA	AA	AA	AA	AA	AA	AA	AA	AA	AA	AA	AT	AA	AA	AA	AA	AA	AT	AA	AA	AA	AA	AA	AA	AA	AA	AA	AA	TT	AA	AA	AA	AA
_	A03	12153203	T	A	TT	TT	AA	AA	TT	TA	TT	TT	TT	TT	TT	TT	TT	TT	TT	TT	TT	TT	TT	TT	TT	TT	TT	TA	TT	TT	TT	TT	TT	TA	TT	TT	TT	TT	TT	TT	TT	TT	TT	TT	AA	TT	TT	TT	TT
_	A03	12153231	T	A	TT	TT	NN	NN	TT	TT	TT	TT	TT	TT	TT	TT	TT	TT	TT	TT	TT	TT	TT	TT	TT	TT	TT	TT	TT	TT	TT	TT	TT	TT	TT	TT	TT	TT	TT	TT	TT	TT	TT	TT	NN	TT	TT	TT	TT
_	A03	12153234	G	T	GG	GG	GG	GG	GG	GG	GG	GG	GG	GG	GG	GG	GG	GG	GG	GG	GG	GG	GG	GG	GG	GG	GG	GG	GG	GG	GG	GG	GG	GG	GG	GG	GG	GG	GG	GG	GG	GG	GG	GG	GG	GG	GG	GG	GG
_	A03	12153253	G	A	GG	GG	AA	AA	GG	GA	GG	GG	GG	GG	GG	GG	GG	GG	GG	GG	GG	GG	GG	GG	GG	GG	GG	GA	GG	GG	GG	GG	GG	GA	GG	GG	GG	GG	GG	GG	GG	GG	GG	GG	AA	GG	GG	GG	GG
_	A03	12153316	A	G	AA	AA	AA	AA	AA	AA	AA	AA	AA	AA	AA	AA	AA	AA	AA	AA	AA	AA	AA	AA	AA	AA	AA	AA	AA	AA	AA	AA	AA	AA	AA	AA	AA	AA	AA	AA	AA	AA	AA	AA	AA	AA	AA	AA	AA
_	A03	12153408	C	T	CC	CC	CC	CC	CC	CC	CC	CC	CC	CC	CC	CC	CC	CC	CC	CC	CC	CC	CC	CC	CC	CC	CC	CC	CC	CC	CC	CC	CC	CC	CC	CC	CC	CC	CC	CC	CC	CC	CC	CC	CC	CC	CC	CC	CC
_	A03	12153410	T	A	TT	TT	TT	TT	TT	TT	TT	TT	TT	TT	TT	TT	TT	TT	TT	TT	TT	TT	TT	TT	TT	TT	TT	TT	TT	TT	TT	TT	TT	TT	TT	TT	TT	TT	TT	TT	TT	TT	TT	TT	TT	TT	TT	TT	TT
_	A03	12153440	T	C	TT	TT	CC	CC	TT	TC	TT	TT	TT	TT	TT	TT	TT	TT	TT	TT	TT	TT	TT	TT	TT	TT	TT	TC	TT	TT	TT	TT	TT	TC	TT	TT	TT	TT	TT	TT	TT	TT	TT	TT	CC	TT	TT	TT	TT
_	A03	12153465	G	T	GG	GG	GG	GG	GG	GG	GG	GG	GG	GG	GG	GG	GG	GG	GG	GG	GG	GG	GG	GG	GG	GG	GG	GG	GG	GG	GG	GG	GG	GG	GG	GG	GG	GG	GG	GG	GG	GG	GG	GG	GG	GG	GG	GG	GG
G1277C mutation	A03	12153546	C	G	CC	CC	CC	CC	CC	CC	CC	CC	CC	CC	CC	CC	CC	CC	CC	CC	CC	CC	CC	CC	CC	CC	CC	CC	CC	CC	CC	CC	CC	CC	CC	CC	CC	CC	CC	CC	CC	CC	CC	CC	CC	CC	CC	CC	CC
_	A03	12153615	T	C	TT	TT	TT	TT	TT	TT	TT	TT	TT	TT	TT	TT	TT	TT	TT	TT	TT	TT	TT	TT	TT	TT	TT	TT	TT	TT	TT	TT	TT	TT	TT	TT	TT	TT	TT	TT	TT	TT	TT	TT	TT	TT	TT	TT	TT
_	A03	12153660	A	G	AA	AA	NN	NN	AA	AA	AA	AA	AA	AA	AA	AA	AA	AA	AA	AA	AA	AA	AA	AA	AA	AA	AA	AA	AA	AA	AA	AA	AA	AA	AA	AA	AA	AA	AA	AA	AA	AA	AA	AA	NN	AA	AA	AA	AA
_	A03	12153850	C	T	CC	CC	CC	CC	CC	CC	CC	CC	CC	CC	NN	CC	CC	CC	CC	CC	CC	CC	CC	CC	CC	CC	CC	CC	CC	CC	CC	CC	CC	CC	CC	CC	CC	CC	CC	CC	CC	CC	CC	CC	CC	CC	CC	CC	CC
_	A03	12154084	T	A	TT	TT	AA	TT	TT	TT	TT	TT	TT	TT	TT	TT	TT	TT	TT	TT	TT	TT	TT	TT	TT	TT	TT	TA	TT	TT	TT	TT	TT	TT	TT	TT	NN	TT	TT	TT	TT	TT	TT	TT	AA	TT	TT	TT	TT
_	A03	12154192	A	T	AA	AA	TT	AA	AA	AA	AA	AA	AA	AA	NN	AA	AA	AA	AA	AA	AA	AA	AA	AA	AA	NN	AA	AT	AA	AA	AA	AA	AA	AA	AA	AA	AA	AA	AA	AA	AA	AA	AA	AA	AA	AA	AA	AA	AA
_	A03	12154319	A	G	AA	AA	AA	AA	AA	AA	AA	AA	AA	AA	NN	AA	AA	AA	AA	AA	AA	AA	AA	AA	AA	AA	AA	AA	AA	AA	AA	AA	AA	AA	AA	AA	NN	AA	AA	AA	AA	AA	AA	AA	AA	AA	AA	AA	AA
_	A03	12154324	A	C	AA	AA	AA	AA	AA	AA	AA	AA	AA	AA	NN	AA	AA	AA	AA	AA	AA	AA	AA	AA	AA	AA	AA	AA	AA	AA	AA	AA	AA	AA	AA	AA	NN	AA	AA	AA	AA	AA	AA	AA	AA	AA	AA	AA	AA
_	A03	12154343	A	T	AA	AA	AA	AA	AA	AA	AA	AA	AA	AA	NN	AA	AA	AA	AA	AA	AA	AA	AA	AA	AA	AA	AA	AA	AA	AA	AA	AA	AA	AA	AA	AA	NN	AA	AA	AA	AA	AA	AA	AA	AA	AA	AA	AA	AA
_	A03	12154358	G	A	GG	GG	GG	GG	GG	GG	GG	GG	GG	GG	NN	GG	GG	GG	GG	GG	GG	GG	GG	GG	GG	GG	GG	GG	GG	GG	GG	GG	GG	GG	GG	GG	NN	GG	GG	GG	GG	GG	GG	GG	GG	GG	GG	GG	GG
_	A03	12154397	T	G	TT	TT	TT	TT	TT	TT	TT	TT	TT	TT	NN	TT	TT	TT	TT	TT	TT	TT	TT	TT	TT	TT	TT	TT	TT	TT	TT	TT	TT	TT	TT	TT	TT	TT	TT	TT	TT	TT	TT	TT	TT	TT	TT	TT	TT
_	A03	12154585	G	C	GG	GG	GG	GG	GG	GG	NN	GG	GG	GG	NN	GG	GG	GG	GG	GG	GG	GG	GG	NN	GG	NN	GG	GG	GG	GG	GG	GG	GG	GG	GG	GG	GG	GG	GG	GG	GG	GG	GG	GG	GG	GG	GG	GG	GG
_	A03	12154720	G	A	GG	GG	GG	GG	GG	GG	GG	GG	GG	GG	GG	GG	GG	GG	GG	GG	GG	GG	GG	GG	GG	GG	GG	GG	GG	GG	GG	GG	GG	GG	GG	GG	GG	GG	GG	GG	GG	GG	GG	GG	GG	GG	GG	GG	GG
[truncated: 479 more columns]

## Sheet: Table S4
Table S4. The information of G194R in reference genome Chiifu v3.0 and annotation Chiifu v3.5.
Protein	Gene ID	Chromsome	Start	Stop	Strand	A single amino acid substitution	Chromosome	Chromosome position	Genome ref	Genome alt	Gene ref	Gene alt	A single nucleotide substitution
MLPK	BraA03g024960.3.5C	A03	12152738	12154822	Antisense	G194R	A03	12153546	C	G	G	C	G1277C

## Sheet: Table S5
Table S5. The information of the SC-MLPK marker.
Marker name	The chrosome of Chiifu v3.0	Position	Ref	Alt	A1 sequence (5' to 3')	A2 sequence (5' to 3')	C1 sequence (5' to 3')
SC-MLPK	A03	12153546	C	G	GAAGGTGACCAAGTTCATGCTAAATTGCTCTTGGTTGTGCAAAAG	GAAGGTCGGAGTCAACGGATTAAATTGCTCTTGGTTGTGCAAAAC	GAGGTTTTGAAGTCGCGGTATATG

## Sheet: Table S6
Table S6. The information of 131 HRM markers.
Marker name	The chrosome of Chiifu v3.0	Start	End	Bin marker name	Bin genetic distance	Left primer sequence (5' to 3')	Right primer sequence (5' to 3')
A01_2	A01	272535	272640	A01bin001	0	TCATGTTTCTTCTCTTCTCTCCGA	TGTCGATAATGCCGAAGCGA
A01_18	A01	1812278	1812357	A01bin007	7.49	TGACGCCTAGAAATTGGGGT	TGCTTTCTTTTTCTTTAGCACGT
A01_25	A01	2510151	2510294	A01bin011	18.074	ACCGAACACACATACAAGGCT	CACTTTAGATGCAAGCTTTCCTGA
A01_37	A01	3703294	3703426	A01bin019	31.442	TGGGTGTTATCCGCTTAAGTGT	GTTCGATTCTCCACCGGTGT
A01_51	A01	5177280	5177377	A01bin024	36.358	ACCCTCGAGAGATGAATATGCA	GCAGGAGTTCCATTGCCGTA
A01_70	A01	7038272	7038355	A01bin032	46.126	TGTTTCCTGTTCACATGGCAC	TGTTCTTGGTGTTTTGGTAGACA
A01_108	A01	10830887	10830977	A01bin043	57.152	TTCACAAAGTTGTCTGCCTT	AAACCTCAACCAAACTTCTC
A01_232	A01	23223747	23223867	A01bin058	67.108	AGAGCGGTCAGAGAAACACT	CGTCTTCTCATTTCGCTGCTG
A01_249	A01	24981571	24981718	A01bin064	75.512	GTGCGAGTTCACGAGATGGT	AGCTTGTGTTTAGTGTTCGTCT
A01_261	A01	26135446	26135586	A01bin071	82.717	CATGAAAACCATGCATGCTCT	AGTCCTTCAATGTTAAACTGCAAA
A01_275	A01	27568501	27568649	A01bin078	94.4	GCATGTATTGAGCGACGACC	GGCTTAGGTTGAACAACGGG
A01_288	A01	28853723	28853849	A01bin084	102.713	TCGGCATGAAATGGAAAATTGAGA	CCGATGTGGTAGTTTGAACGG
A01_293	A01	29376180	29376264	A01bin088	106.843	GCTTTCACATTCAAGCATAC	CTCCCTTATTGGAATCAATC
A02_2	A02	262112	262260	A02bin001	0	CCCCCTTTACGCTGATGCAT	TTCTAGTTTCAACTCTTCCCCAA
A02_12	A02	1224791	1224878	A02bin005	5.49	ACTCAACCTAGGTGTGGTGG	ACCAACTCACAGGATCATTGTCA
A02_20	A02	2047478	2047606	A02bin010	12.952	GCTTCTAAAGGCATGCCAGC	GCTGTTTTGGTCCAGGAAGC
A02_30	A02	3090444	3090543	A02bin016	23.375	CGAGTCGGGTCTAGTTTGGG	TCAAGTCTCGGTTTAGTCAAGT
A02_45	A02	4525718	4525861	A02bin024	32.38	GCTGAAATCTGCGTGAGTGC	TCTTTGCTCCCATTAATCCGT
A02_67	A02	6723079	6723205	A02bin034	41.382	ATCTCCAAGTGGCATCGCAA	ACGAGGTAAACTGTCGCTGT
A02_101	A02	10185623	10185727	A02bin040	48.303	TCGTTTTCGCTGGTTGCTTG	TGTCACCATATGAATGCCAAAATCA
A02_131	A02	13147564	13147696	A02bin051	60.046	AGTGAAGACACCAATCCAACCA	TGAGTTTTACACACGTAGTCACA
A02_221	A02	22120104	22120253	A02bin058	69.23	ACCGGATTGAGGAACATGCA	CTCACAACGAACACAAGGCT
A02_264	A02	26495020	26495169	A02bin067	75.021	TGATCGCCTCCTATTTCTCGA	GCAACTCTGGCTCCTCGTAA
A02_286	A02	28675976	28676061	A02bin076	87.327	AGAGATCGATGTCGTCCTGT	AGGGAACTCGAGTACATTTTCCT
A02_302	A02	30218225	30218324	A02bin081	94.157	ACCTCACCAAAAGGCACCTT	AACGGCGAGTCTGATGAGTG
A03_2	A03	212936	213048	A03bin001	0	TGTGAGTTGAAAGCTCCAGACA	AGGTGAGGGAACTATGCTCT
A03_13	A03	1312096	1312222	A03bin003	2.752	TCGACGCAATAAAAGAGAGAGCT	AGTGTTTCACTCAATCACCGT
A03_23	A03	2390197	2390296	A03bin008	9.642	ACCAAACACACACAATGCTAGC	AGAACACCCACGAAAGAGGT
A03_36	A03	3676213	3676359	A03bin015	17.223	ACGCTATGCTCTAACTCAAACCA	TCTGTCATATTTTTCGAACGAATGT
A03_44	A03	4406886	4407033	A03bin021	25.531	AGGGTTTGCGAAAAGGAAGAGA	TCTTGACGACGGTTGCACTT
A03_70	A03	7007817	7007928	A03bin032	34.481	TCAGTATCTCACTTCTCAGACTCA	AAGACGCTTCCCCTAATGGC
A03_91	A03	9101969	9102090	A03bin039	40.647	AAACGCACCTGAGACGTTCT	TGGAAGCTACGACGAGGAAC
A03_138	A03	13837690	13837785	A03bin048	50.445	ACCACTGCTTTTGAGACTATAGGT	CACATGTTTCGTTATACACAGGTGT
A03_151	A03	15175865	15175975	A03bin051	55.298	ACACATCACAAACCTGACCGA	TGTGACTCTTTGTGTCCGAA
A03_174	A03	17440981	17441116	A03bin057	62.206	ACTTAAGAATGTGTAACTTGACCCA	CGGTTGAAAAGACATACGCTGT
A03_181	A03	18182293	18182406	A03bin059	66.383	CGACGTCGTTTTGCTTTCAA	ACTGCGAAGTTTGGTGCTTC
A03_197	A03	19772279	19772379	A03bin063	71.123	CTGCCAATACGTTGCTTCCG	GGGTATGTGGAGCACCTAGC
A03_211	A03	21129834	21129952	A03bin070	78.86	TCACACCTTCACAGCACACT	TGTGAGAGACAAAACTGATGAGC
A03_223	A03	22398444	22398528	A03bin074	86.052	GGTTATAGACCTTGGTATGGTGGG	ACGTTGACCTGAGATTAGTCGT
A03_235	A03	23517602	23517702	A03bin079	97.234	GCACGTAGAAGCGAGGAGAA	AGCCTCGCTTCTATCTCCCT
A03_280	A03	28019270	28019389	A03bin090	106.653	ACTCACAAGTCAACACAATAAAACA	TTCGAATCAGTAGGCCCAGT
A03_379	A03	37954871	37954987	A03bin101	111.755	TGCTTAGTTTAGAAAGGTAGATGGA	ACGGTTACAAGGTCGATTCGA
A04_7	A04	730281	730394	A04bin003	2.251	TGACTCTCCTTTCGAGCCTTG	TGGCTCTCGTGTTTAACCGT
A04_19	A04	1932250	1932366	A04bin012	10.752	TTGGTTGGTTTCCGGAAAGT	CCCTCTCTTTTTGTCTGCAACA
A04_27	A04	2707275	2707423	A04bin015	16.294	AGGAATAACAAGATCTTCGGCAGA	TCATCGCCTTTGAACGGTCG
A04_42	A04	4258537	4258660	A04bin021	23.321	AGATGATTTTGCTGATTACGTTCA	TTTTGTTTCCCGAGATTGTTGT
A04_98	A04	9811303	9811446	A04bin026	27.799	TGGCTATTTCTCTGACCCGT	TGTGTTTCCTGACCCTGACC
A04_125	A04	12551036	12551185	A04bin036	33.861	ACCACACACACATACCAATATCT	GGAGTTTGATTGGTGAAGGTGA
A04_142	A04	14249736	14249884	A04bin040	38.811	ACAGAGTGCCTCATCAAGATGA	AGCTGCAGTAGGCTTATGCA
A04_169	A04	16985169	16985316	A04bin047	47.291	TCGTGGCGTTTTCTGTTTCG	GCAGTAGACACCATTAAACATTGC
A04_179	A04	17907892	17908005	A04bin052	53.588	ACAGGCGGCAACATTAAGGA	TGTCCTTGGCAATAAACCAAACA
A04_182	A04	18205878	18206013	A04bin054	54.976	TGTCCAGTTGAGCTAATTGCAC	TTACAATGCTCCGCGGATGT
A04_192	A04	19217281	19217419	A04bin061	60.489	GGAGGCCCGGAGCTATATAA	ACGCCAATATACCACCATCTCT
A04_201	A04	20168345	20168468	A04bin066	68.744	CGGTTGATCCAAGGTACGCT	GCAGTTCGGAGATTTCACGC
A04_212	A04	21206019	21206166	A04bin069	71.577	TGTTTCGCTGGATAATAGCAGT	AGTTTGGTGGATTTTGGGGT
A05_0	A05	18135	18265	A05bin001	0	GAGCCACGGCCATAGTGATT	AGTCCACCTGGCTCTTACGT
A05_7	A05	728603	728714	A05bin002	2.726	CCGACAAGCAAGGTGAACGA	GGTGACGACAACGATAACAATT
A05_16(6)	A05	1661072	1661191	A05bin007	15.932	TGCTCCATGTATCAAAACCCT	ATCCGGTCCCCTGATCTGAA
A05_20	A05	2049142	2049286	A05bin009	25.397	AGTTCGGATCTTTGAAGTGGGA	GACGACCATTGAGACCCGAG
A05_39	A05	3947211	3947336	A05bin017	36.92	GGATTATCCAGTTTAACCAAAAGGT	AACTGCTCATGTCACAACTCT
A05_59	A05	5906021	5906148	A05bin024	43.845	GGTACCGAACCTCTGGTTTAGT	AAGCTTGTTGCCCTACCCAA
A05_86	A05	8671024	8671173	A05bin031	52.075	TGCATTGGTTTTTCACATCTCTT	GGAAGAGTTAGACCAAAACAGTACA
A05_145	A05	14576796	14576931	A05bin040	56.446	TATGTCGCAGTCCACCTTCG	AAGAGAAGGCCACCATGTCC
A05_200	A05	20018344	20018443	A05bin064	60.546	TGATTTCCGTCTGAAAAGAGGA	GGCCTTCCATCATCCCATCA
A05_230	A05	23082941	23083046	A05bin076	71.512	CCCCTGCGTCGTTTCAAAAG	AGACTAGTTATCAGCACTTGTGA
A05_234	A05	23473327	23473473	A05bin078	73.588	GTGGAAGGATCAAGCACCCA	TGCATGTCATGTTGATAGCTCG
A05_249	A05	24946971	24947120	A05bin088	89.205	TGCATCCGCGTAGATTTTAGT	CGCATATAACAAATTTTCTGGACGG
A05_267	A05	26706173	26706281	A05bin096	103.188	TGGACACATCGAAGAAAGGCA	GCAGTGCATGCGATCATCAA
A05_274	A05	27409949	27410074	A05bin099	105.923	ACCAACTTGGCCTTTGTCCA	TGAGATGCTGCCACGTGAAT
A06_2	A06	252031	252167	A06bin000	0	GAGCTCTCATCCAGGGAAGC	AATTCTTCAGGGAGCGCCTC
A06_10	A06	1072680	1072759	A06bin001	1	TCCGGTCTCTCTATTGGGCT	AACCTGCATGCAAAATTGGGT
A06_26	A06	2694985	2695071	A06bin006	6.804	ATGCACGCTGAGTACATGCT	AGTGTTTACCAATCACCCCTT
A06_33	A06	3359915	3360047	A06bin010	17.18	GCTGTGTGCCATAAGACTGC	ATTTGTAGGAAGTCAAAACAGCTT
A06_41	A06	4195672	4195801	A06bin014	22.088	GAGGAGACCACTGTCAGGGA	TCAAAGCAAGACATCTATCAATTGC
A06_56	A06	5662402	5662483	A06bin020	30.553	TGTTTACGATATAGGCGCGCT	CCATGCCGTTTCTCTTTACCC
A06_75	A06	7570811	7570937	A06bin029	42.047	ACTCTCTCTGCGTTGCTTCC	CCGAACAAAGTGAATGCCGG
A06_132	A06	13209503	13209640	A06bin039	50.895	CGAGAGACATTGTTCAAAACCGT	CCAGGGTTTCAGTCGAAGGA
A06_224	A06	22438089	22438207	A06bin052	59.78	GGCACACCCTTTCTTGAGCT	TGTGTAGGCTATGAAGGGCAC
A06_237	A06	23773633	23773744	A06bin058	69.794	TGACTTCTTGTGAATTAACAGGACT	TGGTAAGGTCCCTTGAGAATCG
A06_245	A06	24543327	24543476	A06bin064	78.718	ACAACCACAATGAGCTGAGT	CCACCCCTTAACATTAGCCA
A06_272	A06	27227546	27227641	A06bin073	88.424	TCCCACTACAATACAAAACTGCA	TGGAAGACGATGAAAGGGTTT
A06_286	A06	28669963	28670083	A06bin080	98.031	AGTAAGTTGATCAAGCAATGGC	GCAACTCGAACTCAGAGGCT
A07_17	A07	1784505	1784631	A07bin005	3.759	GTGCAGCGTATTTGATGGACA	GCCACGTCCTCTTGTACCAA
A07_119	A07	11977323	11977467	A07bin014	9.994	GCTCAGTGCATGTACAGGTA	TGGCTGCCACAAGGAATTCA
A07_139	A07	13945959	13946106	A07bin019	16.717	AGGCTCTTTGATTGCGATCA	CTTCGAGATTGCTGGACGCT
A07_153	A07	15366869	15367013	A07bin025	25.735	TAACTGCGTGCGATCGATCT	ACCCTCAACAAAAGTCGTCA
A07_184	A07	18451138	18451237	A07bin037	35.319	GCGGGGTTTGTATACCACCA	AGAGCCCACAAGCATTGAGA
A07_200	A07	20088541	20088626	A07bin046	44.933	GGGACACGACTTGGGTCATT	GTCTATTTTCACTTTCGGGCCA
A07_227	A07	22794405	22794511	A07bin055	58.091	ACGTTGATATAATACGGTGAAACGG	AGTAACTTTTTGGACCCACCT
A07_253	A07	25362905	25362986	A07bin062	66.365	CGGGGCTCCTCTACAAATGG	AGCTAGTTAGAACTTTGCTTCCAC
A07_274	A07	27448033	27448182	A07bin072	77.323	CGCCGAAAAGTCACAAGCTT	CTTTCGAGATGGGCACTGC
A07_284	A07	28420552	28420700	A07bin078	90.359	TCCCTCACTTTCTCTCGTGT	ACCCCCATCAAAGACCAATCT
A08_0	A08	47246	47374	A08bin001	7.002	TGCATCTCTTCTCCTTCGTCT	TGTGTGAGAGAGAGACCGGA
A08_12	A08	1214194	1214343	A08bin003	10.019	CTTCCTCATCCCACCTAACGG	TGTGGATACTATGCCTCGGA
A08_39	A08	3901755	3901896	A08bin011	20.964	TCCCATATAAAGCATATTACGCGC	TGGTGTGATTTTATTTTGGATGTGA
A08_126	A08	12620982	12621081	A08bin046	20.127	GGAGCTCCTCTCATGCACTT	TCTTGGCTTTGTATATACAGGGAA
A08_140	A08	14034014	14034163	A08bin051	24.84	ACGGAGACAAGACTGCAAGA	CACCAGTTCTCCCTCGTGTC
A08_170	A08	17059709	17059807	A08bin059	33.648	TCACAGACTCTCCGCTTTGTC	TGAACCAAAAGAAACCACTCCT
A08_181	A08	18102856	18102989	A08bin065	44.895	TGGGCTGGTTCGTTGATTGA	GAAGAAGTAATAAAGAATGGGAGCA
A08_196	A08	19649229	19649319	A08bin069	49.07	GGAGGGAGGAGGAGGAAGTT	ACCTCATAATCCAGGACAGCC
A08_207	A08	20780380	20780466	A08bin075	59.446	GCACGAGAAAAAGAGAGAACTGG	TGAGATTCGGAAAGGAACCCT
A08_228	A08	22869166	22869293	A08bin085	71.876	TCATGCCAATGAAAATCAGTGATGA	AATTCCTCATTAGACTGAAATCCAC
A09_3	A09	368541	368671	A09bin001	0	TCTTGTGCTTCTTCTAGGCTGT	ACACACGTAAATCTCCTCTCGT
A09_8	A09	839094	839220	A09bin004	6.13	TGTTTGTAACTTCATACACACGGT	AGCTCTACTTTCTGAAATCTCCTGA
A09_17	A09	1732820	1732954	A09bin007	9.957	TGGGAAGCTGTTTGTTCAACG	ACAACGAGTCAGAACCAGCA
A09_24	A09	2401745	2401867	A09bin012	16.898	ACGAAAACCATTACTCGACGGA	TGTAACGCCGTACATGTTCCA
A09_43	A09	4369334	4369464	A09bin020	28.555	CCTCAAAACTGCAGTTGCCA	GCCTAGTGAACGGGGAATCG
A09_60	A09	6034165	6034305	A09bin030	35.929	ACACTTAAATTGTGTTGAGTTGGCA	TTGTCTGCTACAAGGCTACAA
A09_87	A09	8758825	8758937	A09bin041	44.942	TGGAGACCGTTCCAAACACA	TCGGTTCCAAGTCTACGAGT
A09_239	A09	23982181	23982310	A09bin082	52.468	AAGCAATCCACGAACCGGAT	CGGCGAGTTCGTGTTTGAAA
A09_347	A09	34784522	34784650	A09bin108	63.222	GCTCTTCCAAGTCATCATTCGG	GGTAGTCTTTTTGTTGTCCACCA
A09_371	A09	37155688	37155837	A09bin117	72.435	TCACCCTCTTGTTTGGTTAATCA	ACCCTTGTTATGCCAATTCACA
A09_385	A09	38597416	38597561	A09bin125	85.149	CCGTTGGGAGATTTCTTCGC	TCGAATCTCACACCGCCAAA
A09_388	A09	38882632	38882761	A09bin126	88.064	TGAAGTCCCTCTTGACCTGT	ACCTCAAGGATCCAAAAGGGT
A09_414	A09	41455147	41455261	A09bin135	98.612	CCGTTGGTTCCATCTCCTCC	CCAGAGGAGGCACCCAAATT
A09_429	A09	42980612	42980731	A09bin139	105.528	ACAGAGGAAGCTCTTGCGTC	AGCAACCAAAACATGAGCGC
A09_445	A09	44591778	44591920	A09bin145	115.168	TCTGGTGATTGGTACGCACA	TGATGATGAAGATTACCTCAGACGT
A10_3	A10	319992	320139	A10bin001	0	TCGGGTATATACAGCAGATTTTACA	TGCATCCTCTTTTTGTTCCTTCG
A10_13	A10	1300054	1300196	A10bin005	4.662	AAAATGCCTGAATGTTGAAGGT	TCTTTTCTTGCGTCATGGCT
A10_43	A10	4309776	4309905	A10bin011	9.709	AAGAGCGACGTAACTAAAGTACA	ACCAAAACCGCACAATTTCTT
A10_104	A10	10423478	10423577	A10bin013	9.709	ACACAAGAAGGGTACACTTGTCA	CGACCAATTGATTCTGGGCAC
A10_122	A10	12261221	12261338	A10bin018	15.864	AGAAAGTTGAATTATCATGGGTGGA	AGATGGTTATACGATGTTGTGCA
A10_126	A10	12638757	12638857	A10bin022	22.109	TACACACCTGCTGATTCCCG	AGTGAAAAAGTTGCGAAATATGCA
A10_132	A10	13265059	13265149	A10bin025	24.186	TCGGTACAATCTGCTATGCACA	TGCATGCACATGTTTGAATAGAA
A10_151	A10	15180253	15180354	A10bin035	33.884	TTGGAGGGACTTCGATGCTT	TGGACTAGGTCTTTTGGGGTC
A10_155	A10	15560961	15561110	A10bin037	41.797	AGTTAGGCACTACTTCCGCA	TTGCAGCATGTTCTGTTCCT
A10_162(5)	A10	16257309	16257458	A10bin040	49.868	TCTCCCTATAAGTCAGTCATTACGT	TCCTTCCATGGAACTTAACGCA
A10_167	A10	16750696	16750823	A10bin044	58.402	TGTTGCAGTACATGAGAAGGGA	ACGAAGGCATTGACCACACA
A10_169	A10	16965870	16966007	A10bin045	60.489	GTGGATTGTGAGCGACCTGT	TGACTAGGTCTAGGTCTCGC
A10_186	A10	18690838	18690927	A10bin049	66.652	ACCTGTCTGTCGTTGGCAAT	GGCTCAGCCCAGTTATATTTATCT
A10_200	A10	20016859	20016974	A10bin052	70.723	TTCACGTGTGATTAGCAGCA	ACGGAAAATTAGGTTCCTTTGTCT

## Sheet: Table S7
Table S7. Boundaries of introgressed segments in three selected individuals.
Individual	Chromosome	Start posittion	End position	Length (Mb)	Heterozygous segment (H)/homozygous segment (R)
BC3-1S1-6	A03	12059865	17244940	5.2	R
	A07	14002870	14798378	0.8	H
	A08	17545364	17810991	0.3	H
BC3-6S1-15	A03	12059865	13353820	1.3	R
	A05	26988562	28480868	1.5	H
	A06	8063373	22238107	14.2	R
	A06	22238108	23347276	1.1	H
	A07	21664339	22681289	1	R
	A08	17545364	19972955	2.4	H
	A08	20796198	21065023	0.3	H
	A09	12255709	12997755	0.7	R
BC3-7S1-14	A03	12059865	16451403	4.4	R
	A03	16451404	16873074	0.4	H
	A06	8101576	19449508	11.3	H
	A09	12255709	35871600	23.6	R

## Sheet: Table S8
Table S8. Assessment of CI valuese and pod rates on Chiifu, R-o-18 and individuals in BC2S1 population.
Line/Population	Individuals	Genetype	Number of pollinated flowers	Seed number	CI value
Chiifu	Chiifu-1	MM	20	0	0
	Chiifu-2	MM	20	2	0.1
	Chiifu-3	MM	20	0	0
	Chiifu-4	MM	20	4	0.2
	Chiifu-5	MM	20	0	0
R-o-18	R-o-18-1	mm	20	230	11.5
	R-o-18-2	mm	20	240	12
	R-o-18-3	mm	20	220	11
	R-o-18-4	mm	20	220	11
	R-o-18-5	mm	20	245	12.25
BC2-104S1	BC2-104S1-1	mm	20	5	0.25
	BC2-104S1-2	mm	20	90	4.5
	BC2-104S1-4	mm	20	110	5.5
	BC2-104S1-5	mm	20	10	0.5
	BC2-104S1-6	mm	20	4	0.2
	BC2-104S1-7	mm	20	100	5
	BC2-104S1-8	mm	20	5	0.25
	BC2-104S1-9	mm	20	90	4.5
	BC2-104S1-10	mm	20	110	5.5
	BC2-104S1-11	mm	20	90	4.5
	BC2-104S1-12	mm	20	150	7.5
	BC2-104S1-14	mm	20	60	3
	BC2-104S1-15	mm	20	80	4
	BC2-104S1-17	mm	20	10	0.5
	BC2-104S1-18	mm	20	60	3
	BC2-104S1-19	mm	20	80	4
	BC2-104S1-20	mm	20	180	9
	BC2-104S1-21	mm	20	110	5.5
	BC2-104S1-23	mm	20	6	0.3
	BC2-104S1-24	mm	20	120	6
	BC2-104S1-25	mm	20	110	5.5
	BC2-104S1-26	mm	20	50	2.5
	BC2-104S1-27	mm	20	130	6.5
	BC2-104S1-28	mm	20	80	4
	BC2-104S1-29	mm	20	30	1.5
	BC2-104S1-31	mm	20	180	9
BC2-111S1	BC2-111S1-1	mm	20	26	1.3
	BC2-111S1-2	mm	20	190	9.5
	BC2-111S1-3	mm	20	10	0.5
	BC2-111S1-4	mm	20	220	11
	BC2-111S1-5	mm	20	180	9
	BC2-111S1-7	mm	20	30	1.5
	BC2-111S1-8	mm	20	30	1.5
	BC2-111S1-9	mm	20	80	4
	BC2-111S1-11	mm	20	60	3
	BC2-111S1-13	mm	20	30	1.5
	BC2-111S1-14	mm	20	90	4.5
	BC2-111S1-16	mm	20	30	1.5
	BC2-111S1-17	mm	20	50	2.5
	BC2-111S1-18	mm	20	60	3
	BC2-111S1-19	mm	20	140	7
	BC2-111S1-22	mm	20	120	6
BC2-126S1	BC2-126S1-3	mm	20	30	1.5
	BC2-126S1-5	mm	20	210	10.5
	BC2-126S1-6	mm	20	180	9
	BC2-126S1-7	mm	20	8	0.4
	BC2-126S1-8	mm	20	90	4.5
BC2-146S1	BC2-146S1-4	mm	14	5	0.357143
	BC2-146S1-6	mm	20	50	2.5
	BC2-146S1-7	mm	20	24	1.2
	BC2-146S1-8	mm	20	60	3
	BC2-146S1-12	mm	20	260	13
	BC2-146S1-13	mm	20	190	9.5
	BC2-146S1-14	mm	20	100	5
	BC2-146S1-16	mm	20	150	7.5
	BC2-146S1-17	mm	20	6	0.3
	BC2-146S1-18	mm	20	90	4.5
	BC2-146S1-23	mm	20	6	0.3
	BC2-146S1-27	mm	20	21	1.05
	BC2-146S1-28	mm	20	90	4.5
	BC2-146S1-29	mm	20	11	0.55
	BC2-146S1-30	mm	20	60	3
	BC2-146S1-31	mm	20	100	5
